# Supplementary material for: Measuring Older Peoples’ Experiences of Person-Centred Coordinated Care: Experience and Methodological Reflections from Applying a Patient Reported Experience Measure in SUSTAIN
Source: PubMed Central journal article supplement (PMC8284500; doi:10.5334/ijic.5504), 2021-07-13
Supplement: ijic-21-3-5504-s1.pdf [file ijic-21-3-5504-s1.pdf]

Supplementary file:

Table 4. Fixed effects of characteristics of service users and administration mode on not reporting of P3CEQ items 5 and 11b; results of two-level mixed-effect logistic regression model (N=13 integrated care initiatives, N=228 users); separate analyses for each characteristic

|                                                       | P3CEQ item 5 missing (vs valid) |              |             |            | P3CEQ item 11b missing (vs valid) |              |             |             |
|-------------------------------------------------------|---------------------------------|--------------|-------------|------------|-----------------------------------|--------------|-------------|-------------|
|                                                       | N users                         | estimate     | se          | P          | N users                           | estimate     | se          | P           |
| <b>Fixed effect of service user characteristics</b>   |                                 |              |             |            |                                   |              |             |             |
| Gender: female (ref. male)                            | 228                             | 0.36         | 0.48        | .45        | 228                               | 0.05         | 0.40        | .90         |
| Age (ref. 65 to 74 years)                             | 227                             |              |             |            | 227                               |              |             |             |
| - 75 to 84 years                                      |                                 | 1.43         | 0.81        | .08        |                                   | 0.19         | 0.53        | .72         |
| - 85 years or older                                   |                                 | 1.46         | 0.81        | .07        |                                   | 0.12         | 0.54        | .82         |
| Education (ref. no schooling or primary school)       | 225                             |              |             |            | 225                               |              |             |             |
| - secondary school                                    |                                 | -0.58        | 0.64        | .37        |                                   | <b>-2.24</b> | <b>0.83</b> | <b>.007</b> |
| - advanced vocational training                        |                                 | -0.30        | 0.66        | .65        |                                   | -0.35        | 0.51        | .49         |
| - high professional/academic education                |                                 | -0.56        | 0.83        | .50        |                                   | -1.58        | 0.87        | .07         |
| Hearing problems (ref. no)                            | 226                             | 0.24         | 0.44        | .58        | 226                               | 0.10         | 0.39        | .80         |
| Visual problems (ref. no)                             | 226                             | 0.41         | 0.46        | .38        | 226                               | 0.32         | 0.40        | .43         |
| Cognitive problems (ref. no)                          | 225                             | -0.03        | 0.63        | .96        | 225                               | 0.24         | 0.67        | .72         |
| Mental health problems (ref. no)                      | 225                             | <b>-1.36</b> | <b>0.66</b> | <b>.04</b> | 225                               | <b>1.37</b>  | <b>0.41</b> | <b>.001</b> |
| <b>Fixed effect of administration characteristics</b> |                                 |              |             |            |                                   |              |             |             |
| Mode of administering: other (ref. face-to-face)      | 228                             | <b>1.95</b>  | <b>0.93</b> | <b>.04</b> | 228                               | 1.72         | 1.17        | .14         |
| Carer: present (ref. not present)                     | 228                             | -0.36        | 0.71        | .61        | 228                               | <b>-1.36</b> | <b>0.62</b> | <b>.03</b>  |
| In combination with qualitative interview (ref. no)   | 228                             |              |             |            | 228                               |              |             |             |
| - interview before P3CEQ                              |                                 | -0.75        | 0.93        | .42        |                                   | -0.57        | 0.69        | .40         |
| - interview after P3CEQ                               |                                 | -0.14        | 0.55        | .80        |                                   | -0.44        | 0.53        | .41         |

Table 5. Reasons identified in open responses or researcher notes explaining missing scores

| Category & meaning                                                                                                                                                                                                                                                                      | Prevalence | Items where category was most prevalent                                                                                                                                                                                                                  |
|-----------------------------------------------------------------------------------------------------------------------------------------------------------------------------------------------------------------------------------------------------------------------------------------|------------|----------------------------------------------------------------------------------------------------------------------------------------------------------------------------------------------------------------------------------------------------------|
| Category A- Question irrelevant/not applicable: the respondent finds the question irrelevant or not applicable to his/her situation                                                                                                                                                     | 72         | Q5 <i>Care joined up in a way that works</i> (N=14)<br><br>Q1 <i>Discussing what is important with care professionals</i> (N=12)<br><br>Q2 <i>Being involved in decisions</i> (N=12)<br><br>Q9 <i>Receiving useful information to self-manage</i> (N=12) |
| Category B- Not understanding the meaning: the respondent fails to understand the meaning of the question, despite researcher facilitation, and cannot score his/her experience. For instance: "I do not know what you are referring to by [CONCEPT]"                                   | 16         | Q2 <i>Being involved in decisions</i> (N=3)                                                                                                                                                                                                              |
| Category C- response was irrelevant: the researcher considered that the respondent failed to grasp the meaning of the question since his/her response was irrelevant to the question and illustrated a lack of understanding, despite further clarifications provided by the researcher | 9          | Q3 <i>Considered as a whole person rather than a disease</i> (N=2)<br><br>Q6 (Single) <i>named contact coordinating care</i> (N=2)                                                                                                                       |
| Category D- question understood but answer not known: open response or researcher notes indicate that the respondent understands the question but does not know the answer                                                                                                              | 29         | Q1 <i>Discussing what is important with care professionals</i> (N=8)<br><br>Q3 <i>Considered as a whole person rather than a disease</i> (N=5)<br><br>Q11b <i>Close ones involved as much as wanted in decisions</i> (N=5)                               |
| Category E- question understood but prefers not to answer: the respondent understands what is being asked, but prefers not to answer                                                                                                                                                    | 1          | Q10 <i>Confidence self-managing health and well-being</i> (N=1)                                                                                                                                                                                          |
| Category F- reason for not scoring the item is unknown: neither a score nor the reason behind-non scoring was entered onto the P3CEQ                                                                                                                                                    | 88         | Q11b <i>Close ones involved as much as wanted in decisions</i> (N=30)<br><br>Q11a <i>Wants close ones involved</i> (N=9)                                                                                                                                 |

Table 6. Principle component analysis (Varimax rotation) of P3CEQ items

|     |                                                  | Component 1 | Component 2 |
|-----|--------------------------------------------------|-------------|-------------|
| Q1  | Discuss what's important with care professionals | .537        | .412        |
| Q2  | Involved in decisions                            | .751        | .178        |
| Q3  | Considered 'whole person'                        | .647        | .096        |
| Q4  | Repeating information                            | .411        | -.378       |
| Q5  | Care joined up in a way that works               | .748        | -.025       |
| Q6  | (Single) professional coordinating care          | .104        | .768        |
| Q7  | Care planning (overall)                          | .087        | .633        |
| Q8  | Support to self-manage                           | .743        | .021        |
| Q9  | Information to self-manage                       | .536        | .167        |
| Q10 | Confidence to self-manage                        | .466        | -.261       |

Table 7. P3CEQ scale and item scores, mean scores or percentages for the total group of service users and subgroups

|                       | Person-centredness<br><br>(scale, 8 items,<br>score range 0-24) |       |      | (Single)<br>named<br>contact<br>coordinating<br>care<br><br>(Q6) |      | Care planning<br>overall<br><br>(average Q7a-d,<br>score range 0-3) |      |      | Wish to involve<br>friends/family<br>in decision-<br>making<br><br>(Q11a) |      | Family/friends<br>involved in<br>decision-making as<br>much as wanted<br><br>(Q11b,<br>score range 0-3) |      |      |
|-----------------------|-----------------------------------------------------------------|-------|------|------------------------------------------------------------------|------|---------------------------------------------------------------------|------|------|---------------------------------------------------------------------------|------|---------------------------------------------------------------------------------------------------------|------|------|
|                       | N                                                               | M     | SD   | N                                                                | %    | N                                                                   | M    | SD   | N                                                                         | %    | N                                                                                                       | M    | SD   |
| <b>Total sample</b>   | 225                                                             | 17.42 | 4.81 | 223                                                              | 54.7 | 223                                                                 | 0.64 | 1.05 | 217                                                                       | 66.4 | 185                                                                                                     | 2.31 | 1.06 |
| <b>Gender</b>         | F(1,223)=0.02, P=.89                                            |       |      | Chi <sup>2</sup> (1)=0.06,<br>P=.81                              |      | F(1,221)=0.26,<br>P=.61                                             |      |      | Chi <sup>2</sup> (1)=0.61,<br>P=.43                                       |      | F(1,183)=1.02,<br>P=.31                                                                                 |      |      |
| - women               | 153                                                             | 17.39 | 4.97 | 152                                                              | 55.3 | 150                                                                 | 0.61 | 1.03 | 147                                                                       | 64.6 | 124                                                                                                     | 2.26 | 1.10 |
| - men                 | 72                                                              | 17.49 | 4.48 | 71                                                               | 53.5 | 73                                                                  | 0.69 | 1.09 | 70                                                                        | 70.0 | 61                                                                                                      | 2.43 | 0.97 |
| <b>Age</b>            | F(2,221)=0.64, P=.53                                            |       |      | Chi <sup>2</sup> (2)=0.36,<br>P=.83                              |      | <b>F(2,219)=4.50,<br/>P=.01</b>                                     |      |      | Chi <sup>2</sup> (2)=5.74,<br>P=.06                                       |      | F(2,181)=1.83,<br>P=.16                                                                                 |      |      |
| - 65 – 74             | 53                                                              | 16.75 | 5.01 | 52                                                               | 53.8 | 53                                                                  | 0.54 | 0.95 | 53                                                                        | 52.8 | 44                                                                                                      | 2.05 | 1.22 |
| - 75 – 84             | 92                                                              | 17.67 | 4.78 | 92                                                               | 53.3 | 90                                                                  | 0.89 | 1.18 | 88                                                                        | 69.3 | 75                                                                                                      | 2.41 | 1.01 |
| - 85 and older        | 79                                                              | 17.50 | 4.70 | 78                                                               | 57.7 | 79                                                                  | 0.43 | 0.89 | 75                                                                        | 72.0 | 65                                                                                                      | 2.37 | 0.99 |
| <b>Education</b>      | <b>F(3,218)=6.76, P&lt;.001</b>                                 |       |      | Chi <sup>2</sup> (3)=2.34,<br>P=.51                              |      | F(3,216)=1.27,<br>P=.29                                             |      |      | Chi <sup>2</sup> (3)=4.33,<br>P=.23                                       |      | <b>F(3,179)=8.84,<br/>P&lt;.001</b>                                                                     |      |      |
| - no/primary school   | 106                                                             | 18.65 | 3.94 | 104                                                              | 57.7 | 103                                                                 | 0.78 | 1.15 | 104                                                                       | 67.3 | 82                                                                                                      | 2.70 | 0.75 |
| - secondary school    | 47                                                              | 17.30 | 4.81 | 47                                                               | 55.3 | 48                                                                  | 0.53 | 1.02 | 47                                                                        | 76.6 | 46                                                                                                      | 2.22 | 0.99 |
| - vocational training | 48                                                              | 16.29 | 5.38 | 48                                                               | 45.8 | 48                                                                  | 0.48 | 0.84 | 43                                                                        | 62.8 | 35                                                                                                      | 1.91 | 1.27 |
| - higher education    | 21                                                              | 14.22 | 5.69 | 21                                                               | 61.9 | 21                                                                  | 0.50 | 0.89 | 21                                                                        | 52.4 | 20                                                                                                      | 1.65 | 1.39 |
